# Supplementary material for: Rearing in an Enriched Environment Ameliorates the ADHD-like Behaviors of Lister Hooded Rats While Suppressing Neuronal Activities in the Medial Prefrontal Cortex
Source: Cells. 2022 Nov 17;11(22):3649. doi: 10.3390/cells11223649 (PMC9688563; doi:10.3390/cells11223649)
Supplement: Supplementary file 1 [file cells-11-03649-s001.zip › Supplementary Figures.pdf]

## Supplementary Figures

### **Rearing in an enriched environment ameliorates the ADHD-like behaviors of Lister hooded rats while suppressing neuronal activities in the medial prefrontal cortex**

Ryo Utsunomiya<sup>1</sup>, Kanta Mikami, Tomomi Doi, Mohammed E. Choudhury, Toshihiro Jogamoto<sup>2</sup>, Naohito Tokunaga<sup>3</sup>, Eiichi Ishii<sup>4</sup>, Mariko Eguchi<sup>2</sup>, Hajime Yano<sup>1</sup>, Junya Tanaka<sup>1\*</sup>

<sup>1</sup> Department of Molecular and Cellular Physiology, Graduate School of Medicine, Ehime University, Toon 791-0295, Ehime, Japan

<sup>2</sup> Department of Pediatrics, Graduate School of Medicine, Ehime University, Toon 791-0295, Ehime, Japan

<sup>3</sup> Division of Medical Research Support, the Advanced Research Support Center (ADRES), Ehime University, Toon 791-0295, Ehime, Japan

<sup>4</sup> Department of Pediatrics, Imabari City Hospital, Imabari 794-0026, Ehime, Japan

\* Correspondence: jtanaka@m.ehime-u.ac.jp; Tel.: +81899605241

Supplementary Figure S1

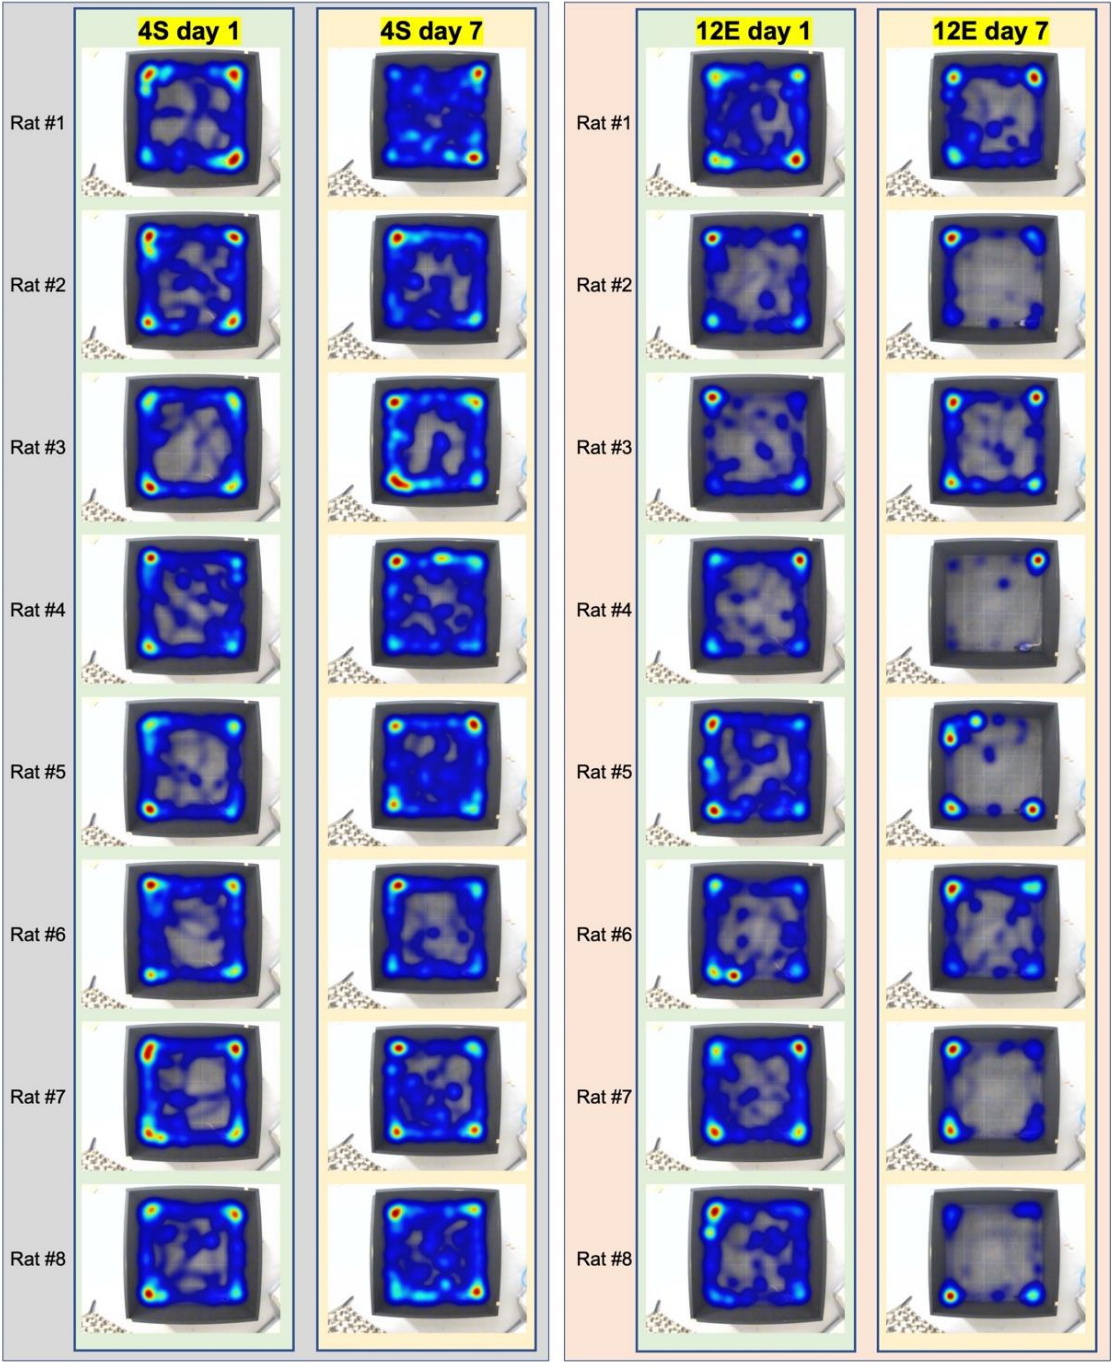

All heatmap data used for statistical analysis for Figure 2C.

## Supplementary Figure S2

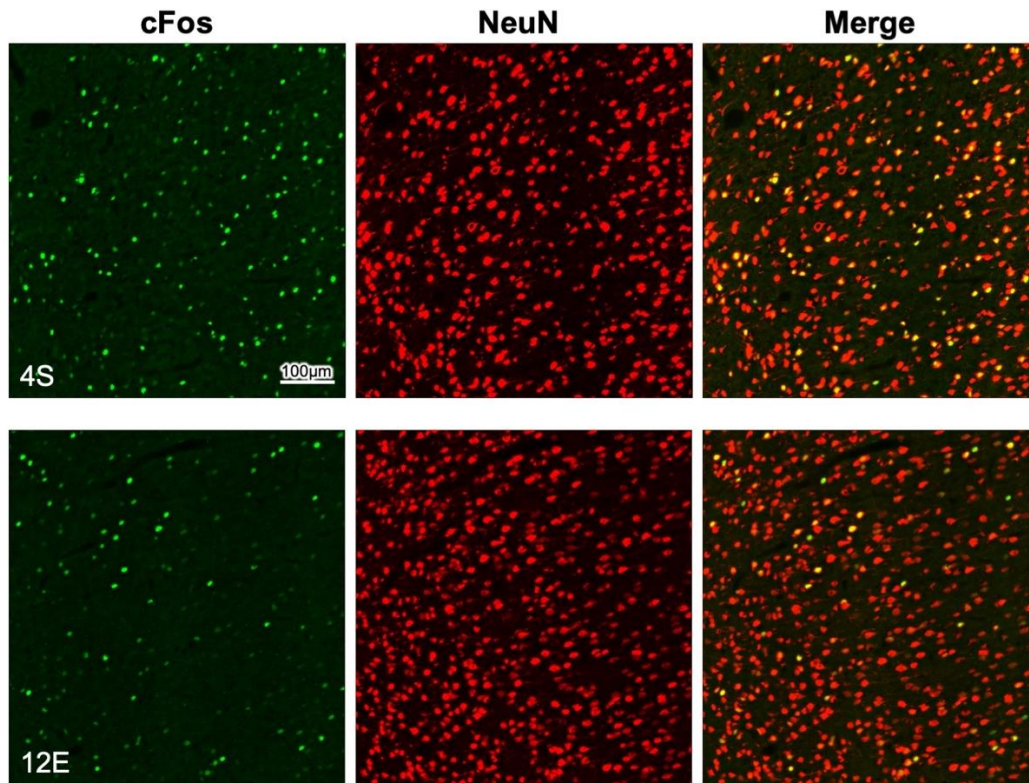

Enlarged micrographs displaying distribution of cFos<sup>+</sup>/NeuN<sup>+</sup> neurons in the PrL of 4S and 12E LHRs.
