# Supplementary material for: Rearing in an Enriched Environment Ameliorates the ADHD-like Behaviors of Lister Hooded Rats While Suppressing Neuronal Activities in the Medial Prefrontal Cortex
Source: Cells. 2022 Nov 17;11(22):3649. doi: 10.3390/cells11223649 (PMC9688563; doi:10.3390/cells11223649)
Supplement: Supplementary file 1 [file cells-11-03649-s001.zip › Supplementary Table S1.xlsx]

## Sheet: Sheet1
RNAseq data shown in Figure 5A
	Geneid	Wistar #1	Wistar #2	Wistar #3	LHR (4S) #1	LHR (4S) #2	LHR (4S) #3	LHR (12E) #1	LHR (12E) #2	LHR (12E) #3	q.value
Cluster1	ARC	457.288	526.947	578.935	1225.68	1106.35	960.414	599.146	492.526	503.781	2.41296e-29
	NR4A1	248.7	348.143	332.23	642.319	555.061	555.981	385.843	343.276	362.093	4.72639e-18
	EGR2	28.6521	42.0716	63.5952	163.424	128.382	137.854	81.5294	60.633	70.8442	2.55987e-16
	EGR1	246.408	290.294	297.143	530.611	506.918	431.821	422.815	306.896	368.98	8.60891e-10
	NR4A3	34.3825	23.1394	31.7976	130.326	72.6866	80.3388	60.6731	56.9017	64.9405	6.45853e-09
	FOSB	56.1581	58.9003	75.6563	174.802	125.55	113.205	59.725	74.6252	78.7158	1.35536e-08
	JUNB	217.756	287.139	299.336	460.277	380.425	410.824	289.145	253.726	281.409	1.74544e-08
	EGR4	154.721	152.51	169.953	265.823	227.5	234.626	145.047	173.504	172.191	4.75545e-08
	CDC6	22.9217	28.3983	28.5082	72.4031	57.5829	57.5153	44.5568	41.0438	53.1332	1.49997e-06
	FOS	67.619	80.9879	96.4892	114.811	111.39	136.028	67.3092	67.1627	71.8282	1.68821e-06
	CXADR	20.6295	13.6733	7.67528	39.3045	34.9273	41.9953	19.9083	25.186	20.6629	5.71227e-06
	TRIB1	20.6295	15.7769	16.447	52.7508	45.3111	38.3435	39.8167	27.9844	31.4863	1.12381e-05
	TIPARP	19.4834	24.1912	18.64	61.0255	37.7593	58.4282	26.5445	37.3126	30.5024	3.03849e-05
	HSPB1	8.02259	9.46611	12.0612	41.3732	26.4315	31.04	10.4282	20.5219	19.6789	3.04345e-05
	CDKN1A	19.4834	12.6215	16.447	44.4762	35.8713	41.9953	22.7524	27.9844	35.4221	4.86643e-05
	HSPA1A	5.73042	1.05179	0	26.8926	10.3838	21.9106	3.79207	9.32815	8.85553	5.20067e-05
	PLAT	131.8	129.37	111.84	186.179	176.525	176.198	109.97	124.997	148.576	0.000102474
	NR4A2	27.506	12.6215	24.1223	50.6822	48.1431	40.1694	26.5445	28.9173	27.5505	0.000105678
	BDNF	66.4729	50.4859	54.8234	106.536	80.2385	120.508	78.6854	77.4236	69.8603	0.000282046
	PSMA8	22.9217	22.0876	29.6046	50.6822	46.2551	43.8212	32.2326	31.7157	30.5024	0.00121649
	KLF4	28.6521	25.243	32.8941	75.5061	64.1908	56.6024	21.8044	31.7157	60.0208	0.0019141
	GADD45G	30.9443	51.5377	50.4376	83.7807	65.1348	61.1671	46.4528	34.5141	37.39	0.00229476
	PIK3C2B	33.2365	28.3983	14.2541	38.2702	64.1908	62.08	37.9207	42.9095	31.4863	0.00280419
	DIO2	132.946	134.629	89.9104	166.527	158.589	170.72	109.022	130.594	136.769	0.0163266
	SHPRH	69.9112	68.3664	53.727	92.0554	86.8463	83.9906	60.6731	69.0283	61.0047	0.0170527
	BCL6B	12.6069	9.46611	8.77175	24.8239	16.9917	18.2588	10.4282	9.32815	8.85553	0.0175299
	PELI1	48.1356	38.9162	40.5693	70.3344	59.4709	59.3412	50.2449	40.111	43.2937	0.0225046
	EDRF1	44.6973	47.3306	37.2799	76.5404	53.807	73.9482	34.1286	54.1032	48.2134	0.0241655
	SVBP	17.1913	11.5697	17.5435	31.0299	28.3195	31.04	17.0643	27.9844	17.7111	0.0308193
	CAVIN4	0	0	0	2.06866	1.88796	1.82588	0	0	0	0.0340755
	PNPLA2	0	0	0	3.10299	0.943982	1.82588	0	0	0	0.0342841
	TOR1B	37.8208	48.3824	39.4729	63.0941	55.6949	62.08	45.5048	41.0438	46.2455	0.0475408
	SSC5D	11.4608	17.8804	10.9647	16.5493	37.7593	29.2141	16.1163	17.7235	14.7592	0.0477971
	NCBP3	28.6521	30.5019	26.3152	53.7852	42.4792	41.0824	37.9207	36.3798	28.5345	0.06017
	ING5	28.6521	13.6733	18.64	41.3732	30.2074	35.6047	23.7004	28.9173	22.6308	0.0623404
	RCOR1	51.5738	46.2788	40.5693	86.8837	66.0787	52.0376	46.4528	43.8423	52.1492	0.0767149
	WDR4	12.6069	11.5697	16.447	26.8926	22.6556	24.6494	18.9603	13.0594	18.695	0.0810059
	ARID3B	18.3374	21.0358	15.3506	31.0299	28.3195	32.8659	22.7524	22.3876	19.6789	0.0822344
	EGR3	88.2485	76.7807	58.1128	113.776	94.3982	99.5106	90.0616	60.633	78.7158	0.0895551
	CHRDL1	32.0904	25.243	20.8329	38.2702	32.0954	42.9082	19.9083	25.186	28.5345	0.108484
	ADO	27.506	12.6215	19.7364	34.1329	28.3195	33.7788	25.5964	18.6563	18.695	0.125114
	MIR138-1	1.14608	2.10358	0	5.17165	2.83195	5.47765	2.84405	0.932815	0	0.136708
	AOX1	29.7982	31.5537	29.6046	45.5105	41.5352	42.9082	27.4925	35.447	31.4863	0.148977
	FOXN3	26.3599	30.5019	14.2541	37.2359	37.7593	35.6047	26.5445	27.9844	27.5505	0.152414
	GNB4	21.7756	16.8286	26.3152	40.3389	38.7033	24.6494	19.9083	22.3876	26.5666	0.155925
	GMFG	2.29217	3.15537	2.19294	7.24031	7.55186	5.47765	2.84405	3.73126	0.983947	0.156576
	LOC100909539	8.02259	11.5697	7.67528	14.4806	17.9357	16.4329	5.6881	12.1266	10.8234	0.172003
	CWC25	67.619	55.7449	38.3764	61.0255	85.9024	75.7741	54.0369	63.4314	52.1492	0.214558
	RNF138	37.8208	39.968	42.7623	65.1628	38.7033	63.9059	44.5568	42.9095	37.39	0.283736
	COQ4	27.506	29.4501	31.7976	41.3732	35.8713	41.9953	25.5964	28.9173	34.4382	0.312246
	Geneid	Wistar #1	Wistar #2	Wistar #3	LHR (4S) #1	LHR (4S) #2	LHR (4S) #3	LHR (12E) #1	LHR (12E) #2	LHR (12E) #3	q.value
Cluster2	ADPRHL1	41.259	19.984	33.9905	3.10299	1.88796	8.21647	14.2202	7.46252	9.83947	4.09273e-08
	GPR22	115.755	106.231	109.647	65.1628	59.4709	67.5576	94.8017	77.4236	84.6195	2.41592e-06
	LOC300308	40.113	36.8127	39.4729	27.9269	14.1597	28.3012	44.5568	46.6407	39.3579	0.00384677
	GIMAP6	12.6069	6.31074	4.38587	1.03433	0.943982	1.82588	6.63612	6.5297	10.8234	0.00526899
	ZSCAN25	30.9443	34.7091	25.2188	18.6179	18.8796	20.9976	34.1286	34.5141	39.3579	0.0105099
	CLN3	41.259	48.3824	46.0517	26.8926	26.4315	35.6047	47.4008	45.7079	42.3097	0.0331657
	BCL3	1.14608	1.05179	1.09647	0	0	0	1.89603	1.86563	4.91974	0.0389235
	LGALS9	48.1356	52.5895	55.9199	29.9956	31.1514	39.2565	38.8687	48.5064	45.2616	0.0467059
	LRG1	11.4608	17.8804	18.64	8.27464	6.60787	5.47765	19.9083	8.39533	23.6147	0.0509442
	LINGO3	28.6521	24.1912	28.5082	17.5836	15.1037	12.7812	20.8564	22.3876	29.5184	0.060873
	NT5M	26.3599	24.1912	23.0258	13.4463	16.0477	14.6071	19.9083	32.6485	25.5826	0.0749595
	VWF	204.003	171.442	149.12	118.948	124.606	134.202	139.358	143.653	230.244	0.121225
	SCN4B	98.5633	114.645	91.0069	65.1628	102.894	60.2541	119.45	101.677	100.363	0.125137
	ZFP580	60.7425	50.4859	51.534	43.4419	39.6472	35.6047	53.0889	49.4392	58.0529	0.136969
	SPATA1	2.29217	5.25895	2.19294	0	0.943982	0.912941	3.79207	4.66407	2.95184	0.14278
	SLC13A5	36.6747	37.8645	37.2799	27.9269	22.6556	27.3882	36.9726	36.3798	39.3579	0.155925
	PTCD2	40.113	38.9162	29.6046	23.7896	21.7116	28.3012	34.1286	41.0438	31.4863	0.174515
	EHHADH	8.02259	11.5697	16.447	8.27464	4.71991	7.30353	11.3762	15.8578	13.7753	0.181198
	EPHX1	43.5512	42.0716	61.4022	37.2359	37.7593	23.7365	41.7127	42.9095	67.8924	0.182642
	SOX12	27.506	34.7091	23.0258	20.6866	19.8236	16.4329	31.2845	26.1188	28.5345	0.194033
	PTPRH	3.43825	4.20716	1.09647	0	0	1.82588	2.84405	2.79844	4.91974	0.21491
	LOC499742	8.02259	11.5697	7.67528	6.20598	4.71991	2.73882	7.58413	13.0594	8.85553	0.218428
	EFCAB10	3.43825	2.10358	3.28941	0	1.88796	0	2.84405	5.59689	1.96789	0.222562
	TRIM16	5.73042	9.46611	5.48234	2.06866	2.83195	4.56471	9.48017	9.32815	4.91974	0.234683
	RT1-M6-2	5.73042	10.5179	5.48234	2.06866	4.71991	1.82588	6.63612	4.66407	8.85553	0.269361
	LOC100365921	29.7982	31.5537	32.8941	24.8239	22.6556	16.4329	36.9726	21.4547	33.4542	0.309718
	Geneid	Wistar #1	Wistar #2	Wistar #3	LHR (4S) #1	LHR (4S) #2	LHR (4S) #3	LHR (12E) #1	LHR (12E) #2	LHR (12E) #3	q.value
Cluster3	NIT2	25.2139	23.1394	26.3152	45.5105	41.5352	44.7341	54.985	70.8939	52.1492	6.08697e-09
	NFIB	24.0678	25.243	30.7011	35.1672	38.7033	50.2118	52.1409	56.9017	57.0689	8.81789e-07
	SLC31A1	22.9217	18.9322	25.2188	32.0642	29.2634	25.5624	36.0246	42.9095	54.1171	4.90332e-05
	SULT1A1	21.7756	18.9322	14.2541	36.2015	27.3755	21.9106	27.4925	45.7079	72.8121	7.6907e-05
	ACER2	43.5512	50.4859	47.1481	49.6478	57.5829	59.3412	72.0493	87.6846	67.8924	9.30001e-05
	SLC9A7	6.87651	1.05179	7.67528	18.6179	9.43982	8.21647	25.5964	15.8578	17.7111	0.000133517
	TCEANC2	13.753	18.9322	18.64	10.3433	11.3278	13.6941	26.5445	27.0516	24.5987	0.000165786
	PTGDS	220.048	477.513	412.272	938.137	491.815	333.224	312.845	236.935	3132.89	0.000530672
	CCDC82	24.0678	25.243	30.7011	36.2015	36.8153	33.7788	39.8167	44.7751	55.101	0.000592537
	PANK1	33.2365	29.4501	31.7976	33.0986	36.8153	38.3435	54.985	51.3048	45.2616	0.000663931
	EXOC8	24.0678	44.1752	26.3152	41.3732	47.1991	39.2565	68.2572	49.4392	50.1813	0.00117636
	ETAA1	13.753	11.5697	10.9647	18.6179	11.3278	10.0424	21.8044	23.3204	24.5987	0.00119056
	FSCN2	0	1.05179	0	2.06866	1.88796	0	5.6881	1.86563	6.88763	0.00135393
	SKP2	16.0452	10.5179	5.48234	14.4806	16.0477	14.6071	26.5445	20.5219	21.6468	0.00137834
	RNF24	13.753	13.6733	8.77175	17.5836	15.1037	14.6071	21.8044	27.0516	23.6147	0.00159182
	GSTM2	2.29217	0	4.38587	6.20598	0.943982	2.73882	6.63612	4.66407	26.5666	0.00297875
	KCNE4	2.29217	0	0	0	0.943982	0.912941	4.74008	3.73126	2.95184	0.00475691
	SPC25	1.14608	1.05179	0	1.03433	0	0.912941	2.84405	5.59689	2.95184	0.00479763
	IL18BP	17.1913	21.0358	12.0612	17.5836	16.0477	22.8235	31.2845	29.8501	25.5826	0.00482983
	HPGD	3.43825	4.20716	3.28941	3.10299	1.88796	5.47765	9.48017	7.46252	9.83947	0.00673801
	TRMT12	17.1913	16.8286	21.9294	17.5836	18.8796	11.8682	28.4405	22.3876	33.4542	0.00676419
	GZF1	36.6747	31.5537	40.5693	46.5448	39.6472	34.6918	52.1409	46.6407	61.9887	0.00796419
	CCNE1	20.6295	27.3466	24.1223	21.7209	27.3755	29.2141	37.9207	36.3798	36.4061	0.00923081
	WNT6	1.14608	1.05179	2.19294	3.10299	4.71991	0.912941	2.84405	2.79844	21.6468	0.012413
	SNCAIP	13.753	13.6733	14.2541	12.412	18.8796	13.6941	23.7004	22.3876	21.6468	0.023306
	PCGF5	6.87651	10.5179	7.67528	7.24031	9.43982	9.12941	17.0643	12.1266	15.7432	0.0241729
	ASB3	30.9443	35.7609	30.7011	37.2359	27.3755	31.9529	51.1929	45.7079	36.4061	0.0260314
	KRT42	2.29217	2.10358	0	4.13732	0.943982	0	7.58413	4.66407	2.95184	0.0277055
	PRRX2	0	1.05179	0	0	0	1.82588	0	0.932815	10.8234	0.0428041
	KRT26	11.4608	9.46611	8.77175	9.30897	14.1597	7.30353	20.8564	10.261	21.6468	0.0432246
	Geneid	Wistar #1	Wistar #2	Wistar #3	LHR (4S) #1	LHR (4S) #2	LHR (4S) #3	LHR (12E) #1	LHR (12E) #2	LHR (12E) #3	q.value
Cluster4	NPAS4	163.89	194.581	146.927	92.0554	101.95	50.2118	47.4008	34.5141	44.2776	1.30893e-20
	CCN1	17.1913	32.6055	41.6658	11.3776	2.83195	3.65176	2.84405	0.932815	1.96789	2.42096e-13
	BTG2	123.777	167.235	203.943	116.879	90.6223	75.7741	76.7893	55.9689	64.9405	1.54772e-11
	PLD4	53.866	53.6413	51.534	40.3389	34.9273	43.8212	22.7524	23.3204	28.5345	1.94162e-07
	SOX10	121.485	132.526	115.129	81.7121	104.782	111.379	72.9973	85.8189	62.9726	2.56113e-06
	FABP7	135.238	129.37	117.322	139.635	125.55	112.292	73.9453	95.1471	88.5553	9.43891e-06
	APOLD1	43.5512	43.1234	50.4376	64.1285	53.807	57.5153	28.4405	41.0438	28.5345	3.97821e-05
	PPP1R15A	59.5964	72.5735	84.4281	73.4374	49.0871	62.9929	47.4008	46.6407	42.3097	0.0012788
	EPB41L4A	17.1913	11.5697	12.0612	15.5149	17.9357	18.2588	5.6881	7.46252	8.85553	0.00134457
	SIPA1	66.4729	78.8843	52.6305	46.5448	61.3588	56.6024	35.0766	43.8423	44.2776	0.00140223
	TIFAB	22.9217	26.2948	20.8329	18.6179	20.7676	16.4329	11.3762	9.32815	13.7753	0.00187882
	GLB1L2	4.58434	2.10358	1.09647	4.13732	1.88796	0.912941	0	0	0	0.00300576
	LEPROT	84.8103	87.2986	76.7528	81.7121	80.2385	80.3388	46.4528	69.9611	65.9245	0.00544317
	HHEX	5.73042	8.41432	8.77175	7.24031	3.77593	6.39059	1.89603	1.86563	2.95184	0.00755543
	LOC500475	3.43825	7.36253	5.48234	7.24031	1.88796	2.73882	0.948017	1.86563	0	0.00778081
	STAG2	79.0798	102.024	109.647	111.708	87.7903	78.5129	66.3612	66.2298	77.7318	0.00880522
	FIGNL1	2.29217	0	4.38587	4.13732	0	1.82588	0	0	0	0.0116891
	NCF1	34.3825	33.6573	31.7976	37.2359	25.4875	40.1694	21.8044	19.5891	25.5826	0.0132475
	MAPKAPK3	35.5286	36.8127	44.9552	37.2359	39.6472	41.0824	32.2326	21.4547	28.5345	0.0153423
	PARP16	18.3374	14.7251	9.86822	17.5836	9.43982	13.6941	6.63612	6.5297	7.87158	0.0158289
	CENPQ	5.73042	3.15537	6.57881	7.24031	3.77593	5.47765	2.84405	1.86563	0	0.0169441
	BCAS1	286.521	322.9	246.705	285.475	281.307	297.619	191.499	304.098	155.464	0.0259442
	CLN8	40.113	58.9003	47.1481	42.4075	53.807	52.9506	36.0246	33.5813	39.3579	0.0282428
	ADCYAP1	44.6973	34.7091	30.7011	44.4762	33.0394	31.9529	26.5445	24.2532	25.5826	0.0301107
	MOSPD1	59.5964	36.8127	33.9905	46.5448	38.7033	29.2141	30.3365	32.6485	16.7271	0.0341655
	TAF1C	45.8434	41.0198	57.0164	36.2015	50.975	52.9506	39.8167	33.5813	30.5024	0.0428644
